# Supplementary material for: Association of large intergenic noncoding RNA expression with disease activity and organ damage in systemic lupus erythematosus
Source: Springer Nature journal article supplement (doi:10.1186/s13075-015-0632-3), 2015-05-20
Supplement: MOESM1 [file 9783698]

**Figure S1**

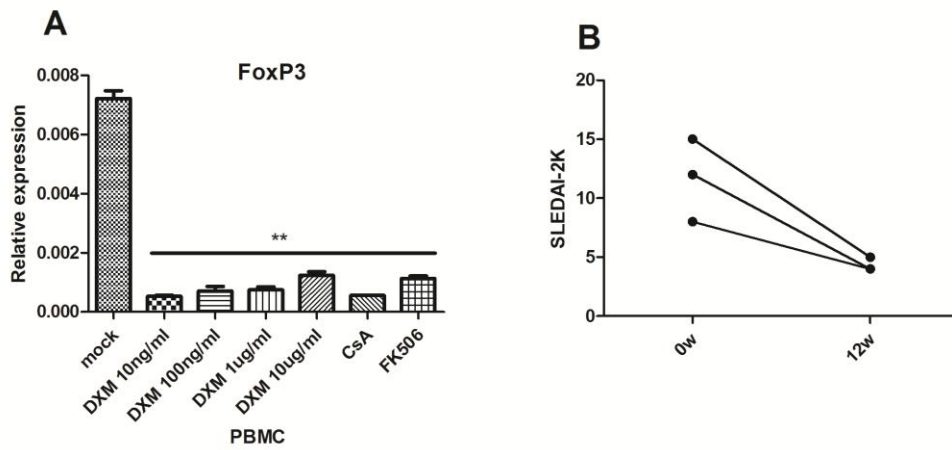

**Figure S1 Effectiveness of the amplified drugs and SLEDAI score flare of three patients (A) FoxP3**

levels significantly reduce after treatment. Results above presented as mean  $\pm$ SD; ns, no significance, \* \*,  $p < 0.01$ . Results above were from two healthy donors. The expressions of FoxP3 were analyzed by RT-qPCR and normalized by RPL13A level. **(B)** SLEDAI score of three patients flare to 4-5 after 12 weeks of treatment.
